# Supplementary material
Source: Elsevier journal article supplement (https://www.sciencedirect.com/science/article/pii/S021265671930191X)
Supplement: mmc1 [file S021265671930191X:mmc1.docx]

**ANEXO. Evolución de los Criterios Diagnósticos.**

**Tabla 1.** **Criterios diagnósticos para Encefalomielitis miálgica (EM).**

| **Acheson**  **1956** | Tras un proceso infeccioso, principalmente vírico, se desarrolla un cuadro clínico:  **1.** Dolor: muscular, cabeza, garganta.  **2.** Fatiga o cansancio.  **3.** Febrícula, a veces ausente.  **4.** Adenopatías.  **5.** Síntomas neurológicos: diplopia, nistagmo, sordera, vértigo.  **6.** Síntomas psicológicos: depresión, irritabilidad.  **7.** No es mortal (benigno) pero con recaidas y secuelas durante meses. |
| --- | --- |
| **Ramsay**  **1988** | El cuadro clínico puede aparecer sin una causa conocida, pero es habitual tras infección vírica respiratoria alta o gastrointestinal. Se manifiesta en casos esporádicos o epidemias.  **1.** Fatigabilidad muscular: prolongada debilidad muscular (y dolor) durante días, incluso tras pequeños esfuerzos físicos.  **2.** Alteraciones cardiovasculares: con extremidades frías e hipersensibilidad al cambio climático, con palidez 20 ó 30 minutos antes que el paciente se queje de estar enfermo.  **3.** Disfunción neurológica: alteraciones en la memoria, concentración, ritmo de sueño, junto a episodios de sudoración y taquicardia ortostática (estos dos últimos no siempre están presentes). Se acompaña de cambios emocionales.  **4.** Fluctuación de los síntomas.  **5.** Tendencia hacia la cronicidad. |
| **Carruthers**  **Criterios de Consenso Internacional**  **2011** | **Criterio mayor. “Agotamiento neuroinmune post-esfuerzo”**  **1.** Marcada y rápida fatigabilidad, física y cognitiva, en respuesta al esfuerzo, el cuál puede ser mínimo, como actividades de la vida diaria o simples tareas mentales, originando debilidad y pudiendo ser causa de recaídas.  **2.** Exacerbación de síntomas post-esfuerzo: síntomas gripales, dolor y empeoramiento de otros síntomas.  **3.** Agotamiento post-esfuerzo, puede ocurrir inmediatamente después de la actividad o aparecer horas o días después.  **4.** Periodo de recuperación prolongado, habitualmente necesita 24 horas o más. Un empeoramiento de la sintomatología puede permanecer días, semanas o más tiempo.  **5.** Un umbral bajo de fatigabilidad física y mental (falta de aguante, de resistencia) resultando en una reducción sustancial en los niveles de actividad previos a la aparición de la patología.  **Otros criterios.**  **1** .**Neurológicos(4)**   - **Trastornos neurocognitivos. A.** Dificultad para procesar información: pensamiento lento, dificultades en la concentración, ejemplo: confusión, desorientación, sobrecarga cognitiva, dificultad para tomar decisiones, habla lenta, dislexia adquirida o de esfuerzo.   **B.** Pérdida de memoria a corto plazo: dificultad para recordar lo que uno quería decir o lo que estaba diciendo, dificultad para recordar palabras o información, mala memoria de trabajo.   - **Dolor. A.** Dolores de cabeza: ejemplo; dolores de cabeza crónicos, que a menudo implican dolor de los ojos, detrás de los ojos o en la región occipital, puede estar asociado con tensión muscular cervical (cefalea tensional). **B.** Se puede experimentar dolor de tipo no inflamatorio en los músculos, uniones del músculo-tendón, articulaciones, abdomen o en el pecho. El dolor puede tener un carácter migratorio. - **Alteraciones del sueño. A.** Patrones de sueño alterados: insomnio, sueño prolongado, dormir la mayor parte del día y estar despierto por la noche, frecuentes despertares, pesadillas. **B.** Sueño no reparador: estar fatigado independientemente de la duración del sueño, somnolencia diurna. - **Alteraciones neurosensoriales (perceptuales y motoras). A.** Neurosensorial y perceptual: incapacidad para enfocar la visión, sensibilidad a la luz, ruido, vibración, olor, gusto y tacto, alteraciones en la percepción de profundidad. **B.** Motor: debilidad muscular, espasmos, mala coordinación, sensación de inestabilidad, ataxia.   **2. Inmunológicos, gastrointestinales, genitourinarios(5)**   - **Síntomas similares a la gripe**, que pueden ser recurrentes o crónicos y empeorar con el esfuerzo, ejemplo; dolor de garganta, sinusitis, adenopatías cervicales y/o axilares sensibles a la palpación. - **Susceptibilidad a infecciones virales,** con periodos de recuperación prolongados. - **Gastrointestinal:** náusea, dolor abdominal, hinchazón, síndrome del colon irritable. - **Genitourinario:** urgencia o frecuencia urinaria, nicturia. - **Sensibilidad alimenticia, medicamentos, olores o productos químicos.**   **3. Metabolismo energético(4)**   - **Cardiovascular:** intolerancia ortostática, hipotensión neural, taquicardia postural ortostática, palpitaciones sin arritmias cardiacas, mareos, aturdimiento. - **Respiratorio:** ahogo, dificultades respiratorias, fatiga de los músculos respiratorios. - **Pérdida de la estabilidad termostática**: temperatura corporal alterada, fluctuaciones de temperatura a lo largo del dia, episodios de sudoración recurrentes, febrícula/fiebre, extremidades frías. - **Intolerancia a cambios de temperatura.**   **Consideraciones pediátricas.** Los síntomas pueden progresar más lentamente en los niños respecto a los adolescentes o adultos. Además del agotamiento neuroimmune postesfuerzo, los síntomas más prominentes tienden a ser neurológicos, dolores de cabeza, alteraciones cognitivas y del sueño.  **1.** Dolores de cabeza: Los dolores de cabeza graves o crónicos son a menudo debilitantes. La migraña puede ir acompañada de una rápida caída de la temperatura, temblores, vómitos, diarrea y severidad.  **2.** Trastornos neurocognitivos: dificultad para concentrarse y de lectura, dislexia especialmente cuando está fatigado, procesamiento de información lento lo que dificulta seguir instrucciones o tomar decisiones. Grandes dificultades para seguir un programa escolar.  **3.** El dolor puede parecer errático y migrar rápidamente. La hipermovilidad articular es común.  **Diagnóstico.**  No es necesario esperar 6 meses para realizar un diagnóstico.  **Encefalomielitis Miálgica típica:** Cumple el criterio mayor y la presencia de los siguientes criterios; neurológicos, en al menos 3 de las cuatro categorías, inmunológicos, gastrointestinales y genitourinarios, en al menos 3 de las cinco categorías, metabolismo energético, al menos 1 síntoma de las 4 categorías. Criterio mayor + otros criterios (3 +3 + 1).  **Encefalomielitis Miálgica atípica:** Cumple el criterio mayor pero es irregular en el resto de criterios.  Como en cualquier diagnóstico médico, la exclusión de otras entidades clínicas se logra por la historia del paciente, el examen físico y pruebas de laboratorio o biomarcadores. Es posible tener más de una enfermedad, pero es importante que cada proceso sea identificado y tratado. Se excluyen los trastornos psiquiátricos primarios, trastornos somatomorfos y abuso de sustancias, en la edad pediátrica la fobia escolar “primaria”.  **Comorbilidades.** Síndrome de fibromialgia, Síndrome de dolor miofascial, Síndrome de disfunción temporomandibular, Síndrome del colon irritable, cistitis intersticial, fenómeno de Raynaud, prolapso de válvula mitral, migrañas, alergias, sensibilidad química múltiple, tiroiditis de Hashimoto, Síndrome Sicca, depresión reactiva. Migraña y el Síndrome del colon irritable pueden preceder a Encefalomielitis Miálgica pero también asociarse. Fibromialgia puede considerarse como un síndrome de solapamiento. |

**Tabla 2. Criterios diagnósticos para el Síndrome de fatiga crónica (SFC).**

| **Holmes. Definición Estadounidense (CDC - Centers for Disease Control).1988.** |
| --- |
| **Criterio mayor.**    Fatiga idiopática persistente o recurrente (al menos 6 meses) o rápida fatigabilidad. Debuta con un inicio definido, que no desaparece con el descanso (reposo en la cama), que reduce o altera la actividad diaria hasta en un 50% respecto a los niveles premórbidos, en una persona que no tiene historia previa de síntomas similares.  **Criterio menor.**   - **Síntomas**(11):   **1.** Febrícula. **2.** Dolor de garganta (faringitis no exudativa). **3.** Adenopatías dolorosas cervicales o axilares (menos de 2 cm diámetro). **4.** Debilidad muscular generalizada e inexplicada. **5.** Mialgia o trastornos musculares. **6.** Fatiga persistente generalizada después de niveles de ejercicio que el paciente toleraba sin problemas antes de la enfermedad. **7.** Cefalea (tipo, severidad y patrón diferentes a los que tenía antes de aparecer la dolencia). **8.** Artralgias migratorias sin derrame articular o hemartrosis. **9.** Trastornos neuropsicológicos (más de uno de los siguientes: fotofobia, escotomas visuales transitorios, pérdida de memoria, irritabilidad excesiva, confusión, dificultades neurocognitivas, incapacidad para concentrarse y de memoria). **10.** Trastornos del sueño(hipersomnia e insomnio). **11.** El paciente describe la instauración inicial de los síntomas como agudo (horas) o subagudo (días).   - **Signos**(3):     Exploración física (confirmados en dos ocasiones, dejando un intervalo de un mes como mínimo). **1.** Fiebre (oral: 37.6-38.6 ºC, o, rectal: 37.8 – 38.8ºC). **2.** Faringitis no exudativa. **3.** Adenopatías axilares o cervicales palpables o dolorosas (< 2 cm).  **Diagnóstico.**  El paciente debe cumplir con el criterio mayor y los siguientes criterios menores: a) presencia de, al menos, 6 de los 11 síntomas y de dos de los tres signos físicos, o b) presencia, al menos, de 8 de los 11 síntomas.  **Condiciones clínicas que excluyen SFC.**  **1.** Cáncer. **2.** Enfermedades autoinmunes. **3.** Infecciones localizadas (abscesos). **4.** Infecciones crónicas o subagudas bacterianas (endocarditis, enf.Lyme, tuberculosis). **5.** Enfermedades micóticas (histoplasmosis, blastomicosis, coccidiodomicosis). **6.** Enfermedades parasitarias (toxoplasmosis, amebiasis, giardiasis, helmintos). **7.** Infección VIH. **8.** Enfermedades psiquiátricas crónicas (depresión endógena, histeria, neurosis de ansiedad, esquizofrenia, uso crónico de tranquilizantes mayores, litio, antidepresivos). **9.** Enfermedad inflamatoria crónica (sarcoidosis, granulomatosis de Wegener, hepatitis crónica). **10.** Enfermedad neuromuscular (miastenia gravis, esclerosis múltiple). **11.** Enfermedad endocrina (hipotiroidismo, enf. Addison, enf Cushing, Diabetes mellitus). **12.** Drogadicción (alcoholismo, abuso de sustancias). **13.** Efectos crónicos de la medicación o tóxicos (metales pesados, pesticidas, disolventes). **14.** Otras afecciones crónicas: pulmonares, cardiacas, gastrointestinales, hepáticas, renal, hematológica. |
| **Sharpe. Criterios Oxford. Definición Británica.1991.** |
| **A.Síndrome de fatiga crónica.**  **1.** La fatiga es el síntoma principal. **2.** La fatiga tiene un inicio definido, no es la fatiga de toda la vida. **3.** La fatiga es severa e incapacitante, y afecta el funcionamiento físico y mental. **4**. La fatiga está presente un mínimo de seis meses, y al menos un 50% durante ese tiempo. **5.** Otros síntomas pueden estar presentes: mialgia, alteraciones del estado de ánimo y sueño. **6.** Exclusiones: personas con condiciones que cursan con fatiga crónica, y aquellos con un diagnóstico de esquizofrenia, enfermedad depresiva maniaca, abuso de sustancias, trastornos alimenticios, enfermedades neurológicas. **7.** No pueden ser excluidos otros trastornos psiquiátricos como la enfermedad depresiva, trastornos de ansiedad, el Síndrome de hiperventilación.  **B.Síndrome de fatiga postinfeccioso.**  **1.** Cumplen los criterios para Síndrome de fatiga crónica. **2.** Tiene que cumplir los siguientes requisitos adicionales: **(A)** Hay evidencia de episodio infeccioso agudo, **(B)** El síndrome está presente durante un mínimo de 6 meses después del inicio de la infección, **(C)** La infección ha sido corroborada por el laboratorio. |
| **Fukuda. Criterios Consenso Internacional (CDC - Centers for Disease Control).1994.** |
| **Criterio mayor.** Fatiga idiopática persistente o recurrente (al menos 6 meses). Debuta con un inicio definido (no es la fatiga de toda la vida), no desaparece totalmente con el descanso, no es el resultado de esfuerzos recientes y origina una reducción sustancial de la actividad previa habitual del sujeto, tanto en las actividades profesionales como sociales o personales.  **Criterio menor.** Estos síntomas deben haber persistido o recurrido durante 6 meses consecutivos o más, y no deben haber estado presentes antes de la aparición de la fatiga.  **1.** Alteración de la concentración o de la memoria reciente, lo suficientemente severa como para causar reducción sustancial de los niveles previos de actividades (profesionales, sociales o personales)  **2.** Odinofagia  **3.** Adenopatías cervicales o axilares dolorosas  **4.** Mialgias  **5.** Poliartralgias, sin signos de hinchazón o enrojecimiento  **6.** Cefalea de nuevo tipo, patrón, o severidad (características diferentes a la habitual)  **7.** Sueño no reparador  **8.** Malestar postesfuerzo de duración superior a 24 horas  **Diagnóstico.** El paciente debe cumplir con la presencia del criterio mayor y criterios menores (4 de 8 síntomas).  **Condiciones clínicas que excluyen SFC.**  **1.** Cualquier condición médica activa que pueda explicar la presencia de fatiga crónica, ejemplo: hipotiroidismo no tratado, apnea del sueño, narcolepsia y efectos secundarios de medicación.  **2**. Existen enfermedades que pueden recidivar o no haberse resuelto completamente tras tratamiento. Si la persistencia de tal condición pudiera explicar la presencia de fatiga crónica y si la condición original no se ha resuelto completamente tras tratamiento, entonces estos pacientes no deben ser clasificados como SFC, ejemplo: cáncer, hepatitis B o C.  **3.** Diagnóstico pasado o presente de un trastorno depresivo mayor con características psicóticas o melancólicas, ejemplo: trastornos afectivos bipolares, trastornos psicóticos (esquizofrenia, delirios), demencias, anorexia y bulimia.  **4.** Antecedentes de alcoholismo y abuso de otras sustancias (dentro de los dos años previos a la aparición de fatiga). Consumo posterior a la instauración de fatiga.  **5.** Índice de Masa Corporal de 45 o más.  Cualquier alteración inexplicada detectada en el examen clínico o prueba de laboratorio que indique una condición de exclusión debe ser tratada y resuelta antes de llegar a un diagnóstico de SFC.  **Condiciones clínicas que no excluyen SFC.**  **1.** Cualquier entidad clínica definida por sus síntomas principales y que no puede ser confirmada por test de laboratorio, ejemplo: fibromialgia, trastornos de ansiedad, trastornos somatomorfos, depresión no psicótica, neurastenia y sensibilidad química múltiple.  **2.** Condiciones bajo tratamiento para aliviar los síntomas, ejemplo: hipotiroidismo, asma.  **3.** Enfermedad de Lyme o Sífilis tratadas adecuadamente, antes de la aparición de fatiga crónica.  **4.** Hallazgos en el examen físico, pruebas de laboratorio o imagen que son insuficientes para indicar la exclusión de SFC, ejemplo: títulos elevados de anticuerpos antinucleares sin evidencia clínica para apoyar el diagnóstico de conectivopatía. |
| **Reeves.**  **Recomendaciones (CDC - Centers for Disease Control). 2003.** |
| **Condiciones clínicas que excluyen SFC.**  **1.** Insuficiencia de órganos, ejemplo: enfisema, cirrosis, Insuficiencia cardíaca, insuficiencia renal crónica.  **2.** Infecciones crónicas, ejemplo: SIDA, hepatitis B o C.  **3.** Enfermedades reumáticas e inflamatorias crónicas, ejemplo: lupus eritematoso sistémico, Síndrome de Sjögren, artritis reumatoide, Enfermedad  inflamatoria intestinal, pancreatitis crónica.  **4.** Enfermedades neurológicas, ejemplo: esclerosis múltiple, neuromusculares, epilepsia o enfermedades que requieran medicación que cause fatiga, accidente cerebrovascular, lesiones con déficit neurológico (traumatismo).  **5.** Enfermedades que requieren tratamiento sistémico, ejemplo: trasplante, quimioterapia y radioterapia.  **6.** Alteraciones endocrinas, ejemplo: hipopituitarismo, insuficiencia suprarrenal.  **7.** Trastornos del sueño primario, ejemplo: Sïndrome de apnea del sueño, narcolepsia.  **8.** Enfermedades psiquiátricas, ejemplo: Trastornos afectivos bipolares, esquizofrenia, trastornos delirantes, demencias, trastornos cerebrales orgánicos, abuso de alcohol o sustancias dentro de 2 años antes del inicio de la fatiga.  **Condiciones clínicas que excluyen temporalmente SFC.**  Incluyen condiciones tratables y que requieren una evaluación a lo largo del tiempo.  **1.** Condiciones agudas o de evaluación, ejemplo: los efectos de fármacos, alteraciones del sueño, hipotiroidismo no tratado, diabetes mellitus no tratada o inestable, infección activa.  **2.** Condiciones que se resuelven, ejemplo: embarazo hasta tres meses después del parto, lactancia materna, cirugías mayores hasta 6 meses tras la cirugía, cirugía menor hasta 3 meses tras la operación, infecciones graves como la sepsis o neumonía hasta 3 meses después de la resolución, desórdenes del sueño como el Síndrome de piernas inquietas y movimiento periódico de las extremidades debe considerarse como exclusiones temporales si son graves a efectos de investigación, pero no pueden ser excluidas si el grado de problema del sueño es insuficiente para explicar la gravedad de la fatiga.  **3.** Condiciones importantes cuya resolución puede tardar al menos 5 años, ejemplo: infarto de miocardio, insuficiencia cardiaca.  **4.** Obesidad mórbida (Índice de masa corporal - IMC de 40 o más).  Si los trastornos psiquiátricos (depresión mayor, anorexia, bulimia) se han curado y no hay sintomatología al menos durante 5 años antes de la aparición de la fatiga no excluyen SFC. Los trastornos somatomorfos deben ser identificados y estratificados, solamente aquellos pacientes que presenten una “fatiga vitalicia” deben ser excluidos definitivamente.  *A efectos de investigación cualquier condición médica o psiquiátrica que curse con fatiga crónica debe ser excluida. |

**Tabla 3.** **Criterios diagnósticos Síndrome de fatiga crónica (SFC)/Encefalomielitis miálgica (EM).**

| **Carruthers**  **Criterios de Consenso Canadienses (CCC)**  **2003** | **Criterios.**  **1. Fatiga.** El paciente debe tener un grado significativo e inexplicable de inicio definido, persistente o recurrente de fatiga física y mental, que reduce sustancialmente su nivel de actividad.  **2. Enfermedad post-esfuerzo y/o fatiga.** Existe una pérdida considerable de resistencia física y mental, rápida fatigabilidad muscular y cognitiva, malestar post-esfuerzo y/o fatiga, y/o dolor, y una tendencia a agravarse los síntomas con un período de recuperación patológicamente lento, usualmente 24 horas o más.  **3. Alteraciones del sueño.** Sueño no reparador, alteraciones en la cantidad del sueño, trastornos del ritmo del sueño.  **4. Dolor (no inflamatorio).**  Hay un grado significativo de mialgia. El dolor puede ser experimentado en los músculos y/o articulaciones, y a menudo es de naturaleza extensa y migratoria. Con frecuencia hay dolores de cabeza significativos de nuevo tipo, patrón o severidad.  **5. Manifestaciones neurológicas/cognitivas.** Deben estar presentes dos o más de las siguientes características: confusión, deterioro de la concentración y de la memoria a corto plazo, desorientación, dificultad en el procesamiento de información, dificultad para recordar palabras, alteraciones perceptuales y sensoriales, inestabilidad espacial, desorientación, incapacidad para enfocar la visión. Ataxia, debilidad muscular y fasciculaciones son comunes.  Puede haber fenómenos de sobrecarga: cognitivo y sensorial (fotofobia, hipersensibilidad al ruido) y emocional (ansiedad).  **6. Al menos un síntoma en dos de las siguientes categorías:**   - **A. Manifestaciones autonómicas:** intolerancia ortostática, hipotensión neural, Síndrome de taquicardia postural ortostática, hipotensión postural retardada, aturdimiento, palidez extrema, náuseas, Síndrome del colon irritable, micciones frecuentes, disfunción de la vejiga, palpitaciones con o sin arritmias cardiacas, disnea de esfuerzo. - **B. Manifestaciones neuroendocrinas:** pérdida de la estabilidad termostática (temperatura corporal alterada y marcada fluctuación diurna), episodios de sudoración, fiebre recurrente, extremidades frías, intolerancia a temperaturas extremas de calor y frío, marcado cambio de peso (anorexia o apetito anormal), pérdida de adaptabilidad y empeoramiento de los síntomas con estrés. - **C. Manifestaciones inmunológicas:** ganglios linfáticos sensibles a la palpación, dolor de garganta recurrente, síntomas similares a la gripe, malestar general, sensibilidades a alimentos, medicamentos y/o productos químicos.   **7. La enfermedad persiste durante al menos seis meses.** Generalmente tiene un inicio ictal aunque puede ser insidioso.  Todos los síntomas deben haber comenzado con la enfermedad o agravarse tras esta. Es poco probable que un paciente sufra de todos los síntomas en los criterios 5 y 6. Los síntomas tienden a fluctuar y cambiar con el tiempo.  Hay un pequeño número de pacientes que no tienen dolor o alteraciones del sueño, pero se puede hacer el diagnóstico si tienen un inicio de los síntomas tras un proceso infeccioso.  **Diagnóstico.** Tiene que cumplir los criterios de; **1.** Fatiga. **2.** Enfermedad postesfuerzo y/o fatiga. **3.** Alteraciones del sueño. **4.** Dolor. **5.** Alteraciones neurocognitivas (al menos 2). **6.** Un síntoma en dos de las siguientes categorías; **A.** Autonómica. **B.** Neuroendocrina. **C.** Inmune.  Toda la sintomatología persiste al menos 6 meses, un diagnóstico preliminar puede ser realizado antes, en niños el cuadro clínico persiste al menos 3 meses.  **Exclusiones.** Excluir enfermedades activas que explican la mayoría de los principales síntomas de fatiga, trastornos del sueño, dolor y disfunción cognitiva. Por ejemplo: Enfermedad de Addison, Síndrome de Cushing, Hipotiroidismo, Hipertiroidismo, Anemias, Hemocromatosis, Diabetes mellitus, Cáncer, S. apnea del sueño, Artritis reumatoide, Lupus eritematoso, Polimiositis, Polimialgia reumática, SIDA, Esclerosis múltiple, Parkinson, Miastenia gravis, Tuberculosis, Hepatitis crónica, Enfermedad de Lyme…etc , trastornos psiquiátricos primarios y abuso de sustancias. Si un una condición médica se solapa pero está bajo control, el diagnóstico de SFC/EM puede ser demorado si los pacientes cumplen los criterios diagnósticos.  **Comorbilidades.** Síndrome de Fibromialgia, Síndrome de dolor miofascial, Síndrome de la articulación temporomandibular, Síndrome del colon irritable, cistitis intersticial, Síndrome de vejiga irritable, fenómeno de Raynaud, prolapso válvula mitral, depresión reactiva, alergias, sensibilidades químicas múltiples, tiroiditis de Hashimoto, Síndrome de Sicca… etc. Fibromialgia puede considerarse como un síndrome de solapamiento.  **Fatiga Crónica Idiopática.** Si el paciente tiene una fatiga prolongada (6 meses o más) inexplicable pero tiene síntomas insuficientes para cumplir con los criterios SFC/EM, puede ser considerado como un síndrome de “superposición o solapamiento". Debe clasificarse como fatiga crónica idiopática. |
| --- | --- |

**Tabla 4.** **Criterios diagnósticos para Enfermedad de intolerancia al esfuerzo.**

| **Wright**  **Instituto de Medicina. (Academia de Ciencias Estadounidense)**  **2015** | **Criterio mayor.**  **1.** Reducción sustancial de la actividad laboral y social que persiste más de 6 meses, se acompaña de fatiga, con frecuencia intensa, de inicio definido que no aparece tras un ejercicio excesivo y no se alivia sustancialmente con el reposo.  **2.** Enfermedad postesfuerzo.  **3.** Sueño no reparador.  **Otros criterios.**  **1.** Alteraciones neurocognitivas.  **2.** Intolerancia ortostática.  **Diagnóstico.**  El paciente debe cumplir con el criterio mayor y al menos uno de los dos otros criterios.  La presencia de otras comorbilidades no descarta esta patología, salvo que los síntomas pudieran explicarse por la presencia de la misma. |
| --- | --- |

**Tabla 5. Síndromes propuestos de Sensibilidad Central.**

| **Yunus**  **2008** | **Fleming**  **2015** | **Veasley**  **2015** |
| --- | --- | --- |
| Síndrome de Fibromialgia  Síndrome de fatiga crónica  Síndrome del intestino irritable  Cefalea tensional  Migraña  Síndrome de disfunción ATM  Síndrome depresivo mayor  Síndrome de piernas inquietas  Síndrome de movimientos periódicos del sueño  Sensibilidad química múltiple  Dismenorrea primaria.  Cistitis intersticial  Síndrome de estrés postraumático  Síndrome premenstrual  Vulvodinia  Vestibulitis vulvar | Distensión abdominal  Dolor abdominal crónico  Fatiga suprarrenal  Alopecia  Ansiedad  Dolor facial atípico  Dolor torácico atípico  Disautonomía  Niebla mental (fibrofog)  Síndrome de boca ardiente  Lengua ardiente  Dolor de espalda crónico  Mareo inespecífico crónico  Dolor pélvico crónico  Prostatitis crónica  Migraña  Dolor crónico testicular  Trastornos crónicos asociados al latigazo cervical  Dolor crónico generalizado  Síndrome de dolor regional complejo  Depresión o trastorno bipolar  Mareo  Hinchazón no evidentes en el examen  Síndrome de Ehlers-Danlos  Fatiga o fatiga crónica  Fibromialgia  Desequilibrio hormonal  Hiperventilación  Cistitis intersticial  Síndrome del intestino irritable  Dolores en las articulaciones  Sensibilidad química múltiple  Alergias o intolerancias alimentarias  Síndrome de dolor miofascial  Palpitaciones  Trastorno de pánico  Dolor pélvico crónico  Síndrome premenstrual  Síndrome de ovario poliquístico  Trastorno de estrés postraumático  Síndrome de taquicardia ortostática postural (POTS)  Síndrome del edificio enfermo  Trastornos de la ATM  Tinnitus  Vulvodinia  Vestibulitis vulvar | Síndrome de Fibromialgia  Síndrome del intestino irritable  Síndrome de disfunción ATM  Síndrome de fatiga crónica  Cefalea tensional  Migraña  Dolor crónico de espalda  Endometriosis  Cistitis intersticial  Vulvodinia |
